# Supplementary material
Source: PubMed Central journal article supplement (PMC3176627)
Supplement: NIHMS323719-supplement-01.pdf [file NIHMS323719-supplement-01.pdf]

| Tomographic slice                                                                   | Manual segmentation                                                                 | Volume completion                                                                    | Volume calculation ( $\mu\text{m}^3$ ) |
|-------------------------------------------------------------------------------------|-------------------------------------------------------------------------------------|--------------------------------------------------------------------------------------|----------------------------------------|
| 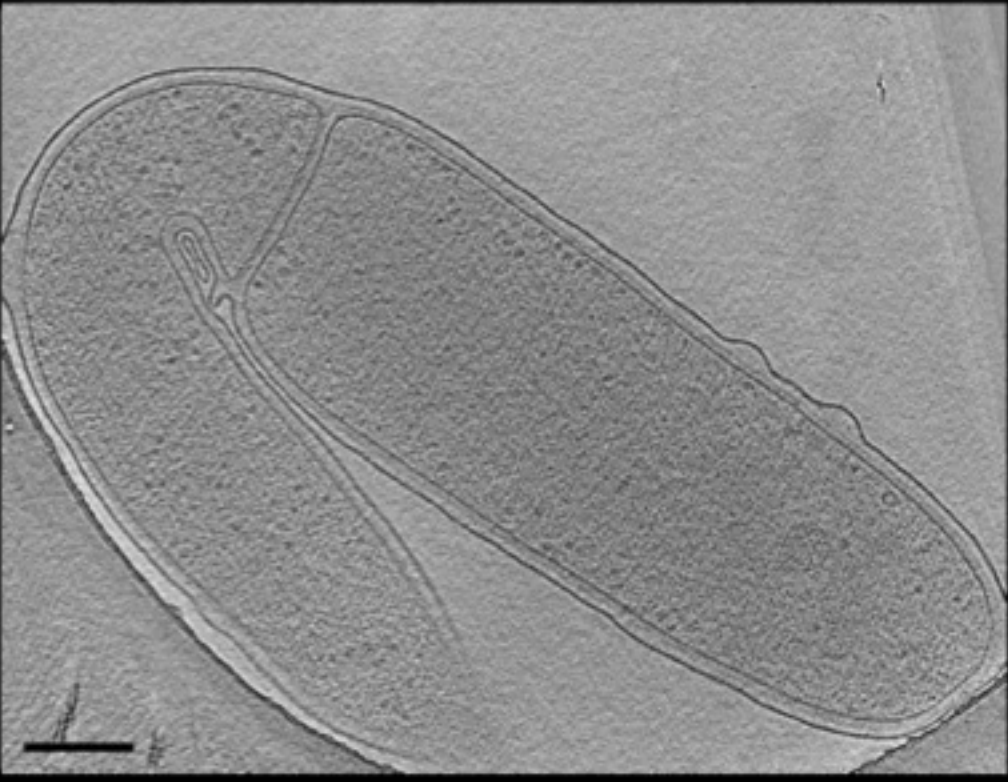   |    |    | $0.22 \pm 0.07$<br>(n=7)               |
|    |    |    | $0.24 \pm 0.06$<br>(n=7)               |
|    |    |    | $0.36 \pm 0.11$<br>(n=53)              |
|   |   |   | $0.32 \pm 0.09$<br>(n=8)               |
|  |  |  | $0.29 \pm 0.08$<br>(n=9)               |
|  |  |  | $0.26 \pm 0.1$<br>(n=7)                |
